# Supplementary material
Source: PubMed Central journal article supplement (PMC8380456)
Supplement: develop-148-187609-s1.pdf [file develop-148-187609-s1.pdf]

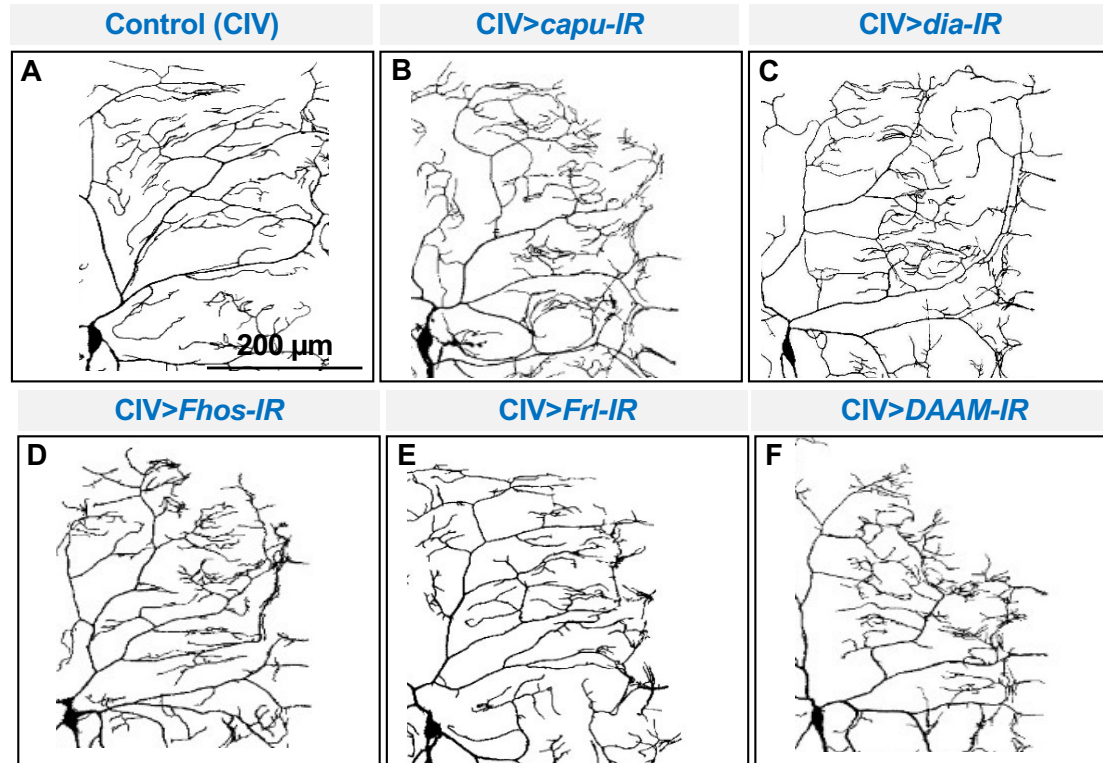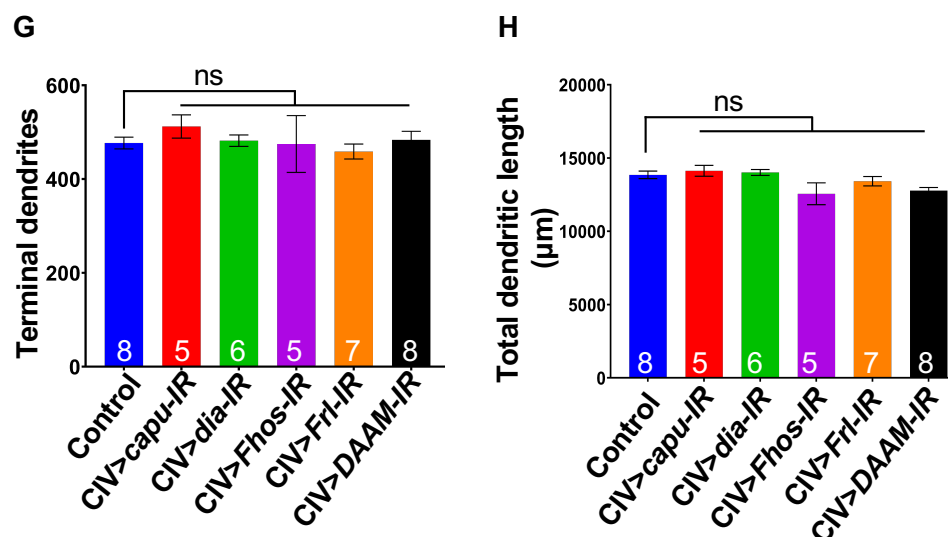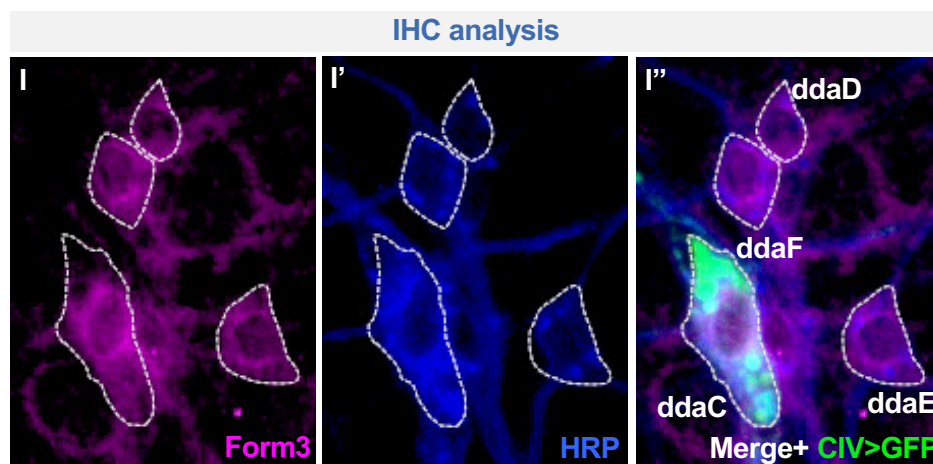

**Fig. S1. Phenotypic analyses of *Drosophila Formins*.** (A-F) Representative images of CIV dendrites in (A) control and (B-F) RNAi knockdowns for *Drosophila Formins* *capu*, *dia*, *Fhos*, *Frl*, and *DAAM*. (G,H) Quantitative neuromorphometric analyses (mean  $\pm$  SEM) with N value indicated on the graphs. (I-I'') CIV-specific GAL4477,UAS-mCD8::GFP third instar larval filets triple labeled with (I) Form3, (I') HRP, and (I'') Merge+GFP. Representative image of N=8 dorsal da neuron clusters. Statistical test performed (G,H): one-way ANOVA with Bonferroni correction; ns represents not significant  $p > 0.05$ .

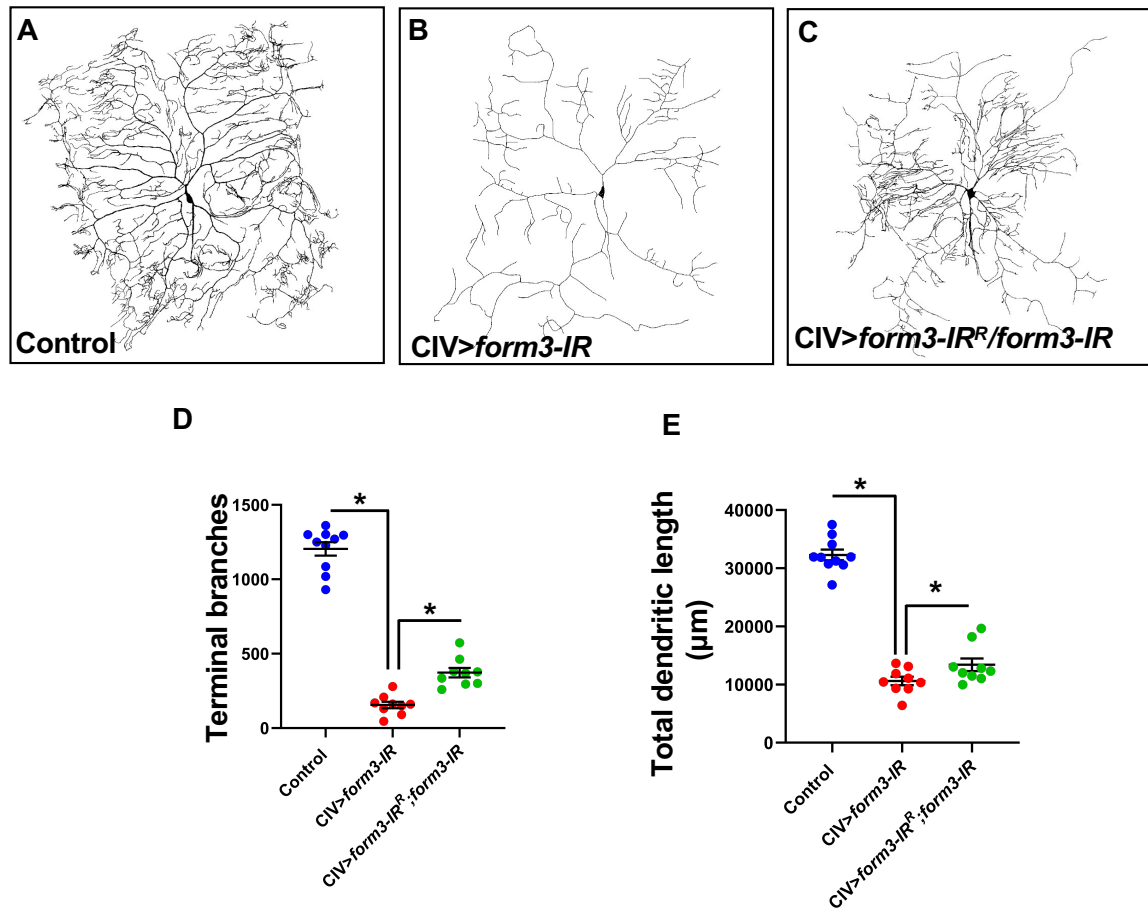

**Fig. S2. Co-expression of RNAi-resistant *form3* and *form3-IR* partially rescues *form3-IR*-induced dendritic defects.** (A-C) Representative images of CIV neurons in (A) control, (B) *form3-IR*, and (C) *form3-IR<sup>R</sup>;form3-IR*. (D,E) Quantitative analyses of the terminal branches and total dendritic length of control (N=11), *form3-IR* (N=10), and *form3-IR<sup>R</sup>;form3-IR* (N=10) CIV neurons. Statistical tests performed: (D) unpaired t-test  $p < 0.0001$  (control vs. *form3-IR* and *form3-IR* vs. *form3-IR<sup>R</sup>;form3-IR*); (E) unpaired t-test  $p < 0.0001$  (control vs. *form3-IR*); Mann-Whitney *U* test  $p < 0.05$  (*form3-IR* vs. *form3-IR<sup>R</sup>;form3-IR*).

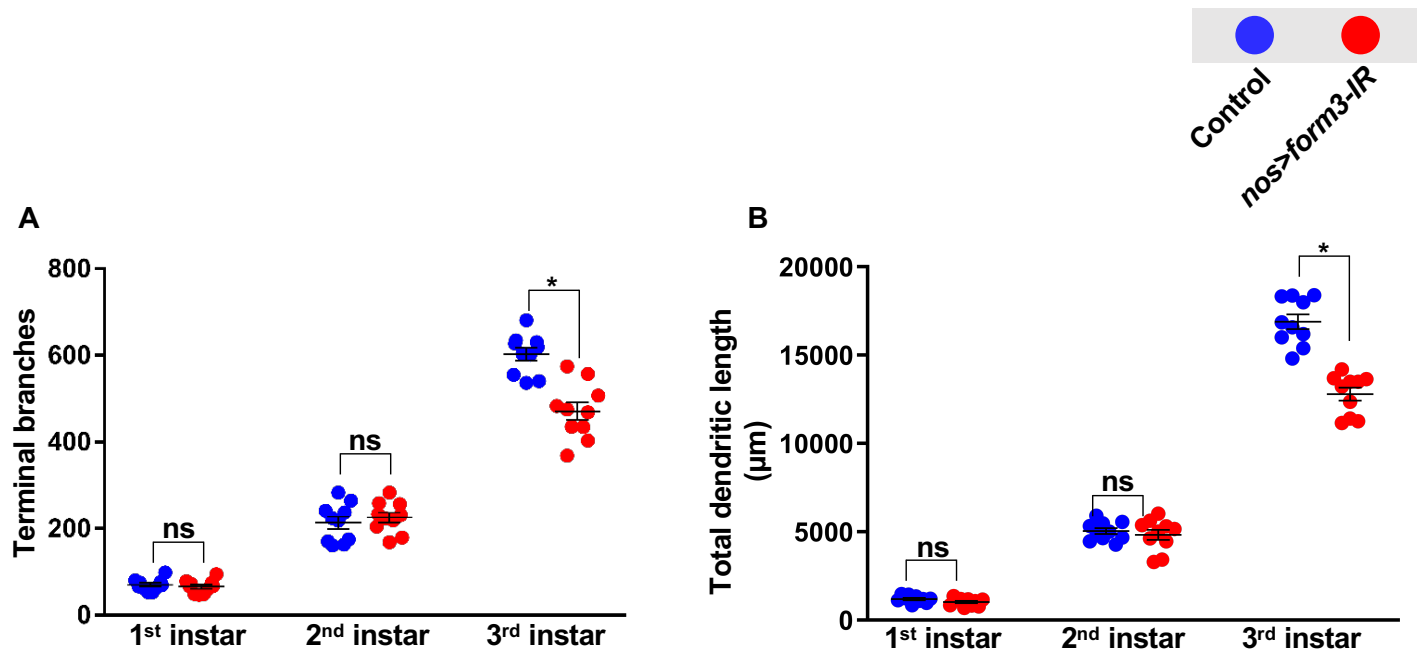

**Fig. S3.** *Form3* is required to maintain higher order dendritic branching over developmental time.

(A,B) Quantitative analyses of the number of branches (A) and total dendritic length (B) of control (N=10) and *nos-GAL4>form3-IR* (N=10) at different stages of development as indicated on the figure. Statistical test performed: (A,B) unpaired t-test, (A<sub>3rd-instar</sub>) and (B<sub>3rd-instar</sub>)  $p < 0.0001$ . ns represents not significant  $p > 0.05$ . Error bars indicate SEM.

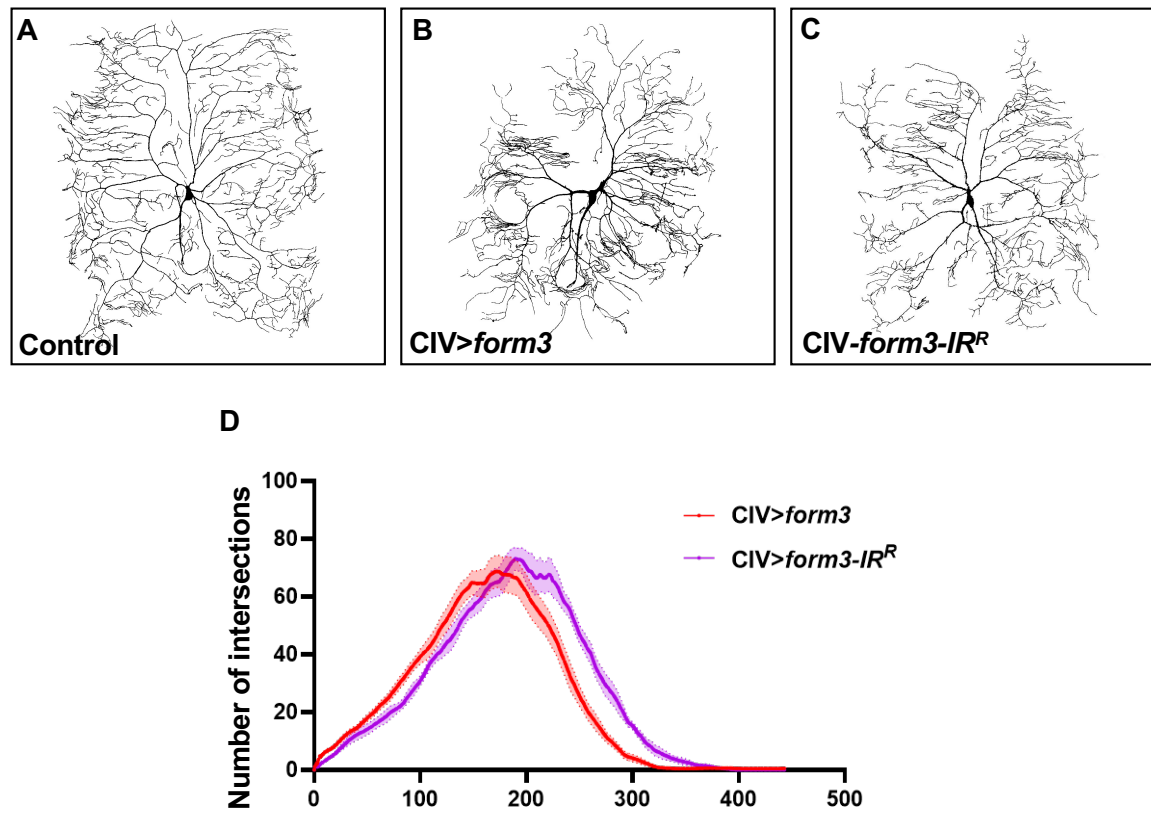

**Fig. S4. Overexpression of *form3* RNAi resistant transgene.** (A-C) Representative images of CIV neurons in (A) control, (B) *form3* overexpression, and (C) *form3-IR<sup>R</sup>* overexpression. (D) Sholl profile of control (N=11), *form3* (N=11), and *form3-IR<sup>R</sup>* (N=5). Statistical tests performed: (D) unpaired t-test  $p > 0.05$ , not significant for critical value or radius.

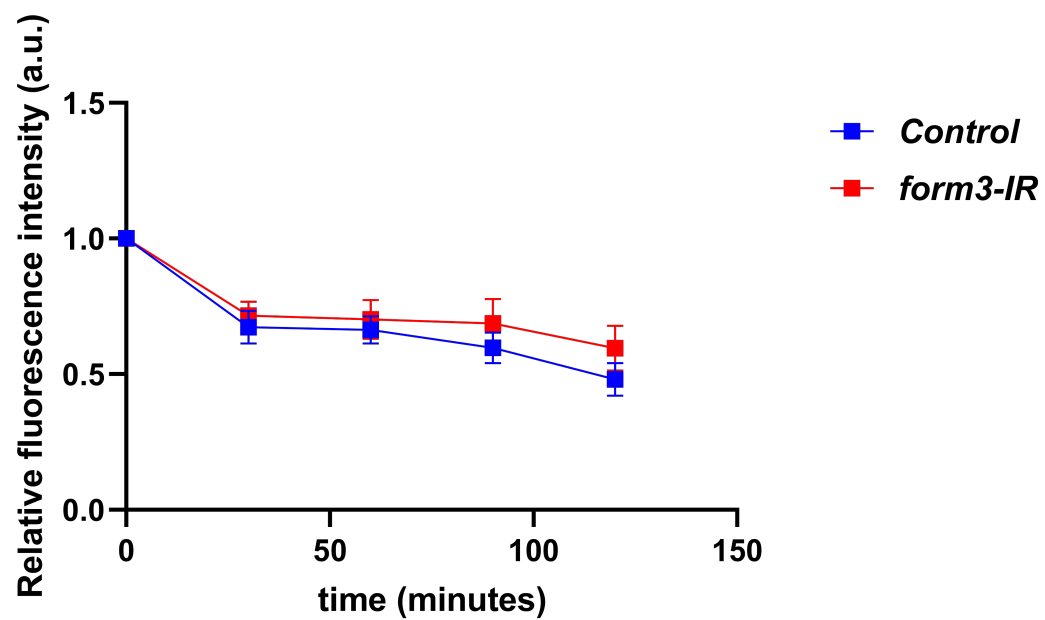

**Fig. S5.** *form3* does not affect MT turnover rate for the subpopulation of MTs that remain in *form3*-depleted CIV neurons. Quantitation of time-lapse imaging of MT stability over 120 minutes (see also Figure 5C-F). Statistical test performed: Unpaired t-test at 0, 60, and 120 minutes, not significant  $p > 0.05$ . Error bars indicate SEM.

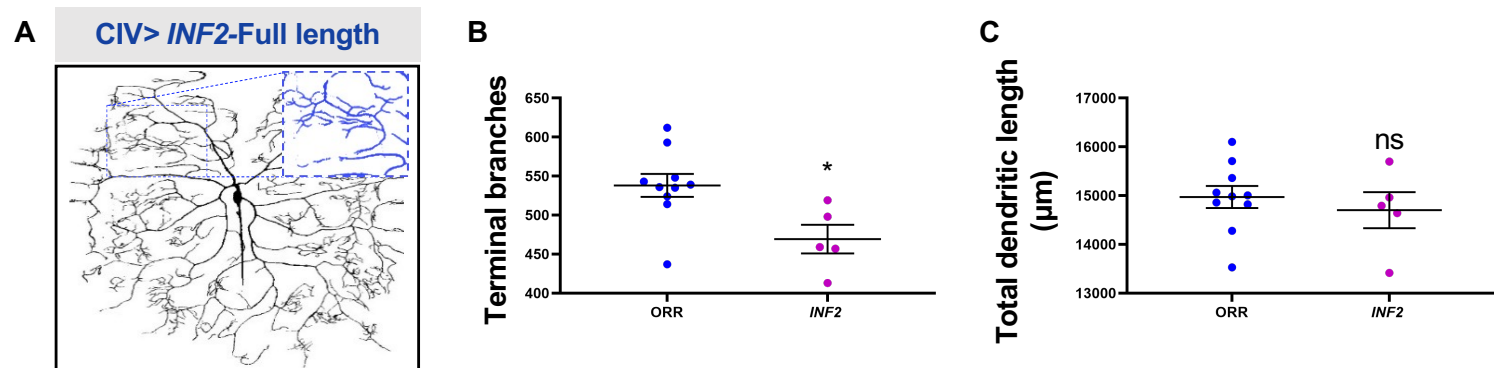

**Fig. S6. Quantitative analysis of *INF2* full length and *INF2-FH1-FH2* overexpression on dendritic morphology.** (A) Representative image of CIV-specific expression of full length *INF2*. (B,C) Quantitative analyses of the terminal branches and total dendritic length of control (N=10) and *INF2* (N=5). Statistical test performed: (B) unpaired t-test,  $p=0.0152$ ; (C) unpaired t-test, ns represents not significant  $p>0.05$ .

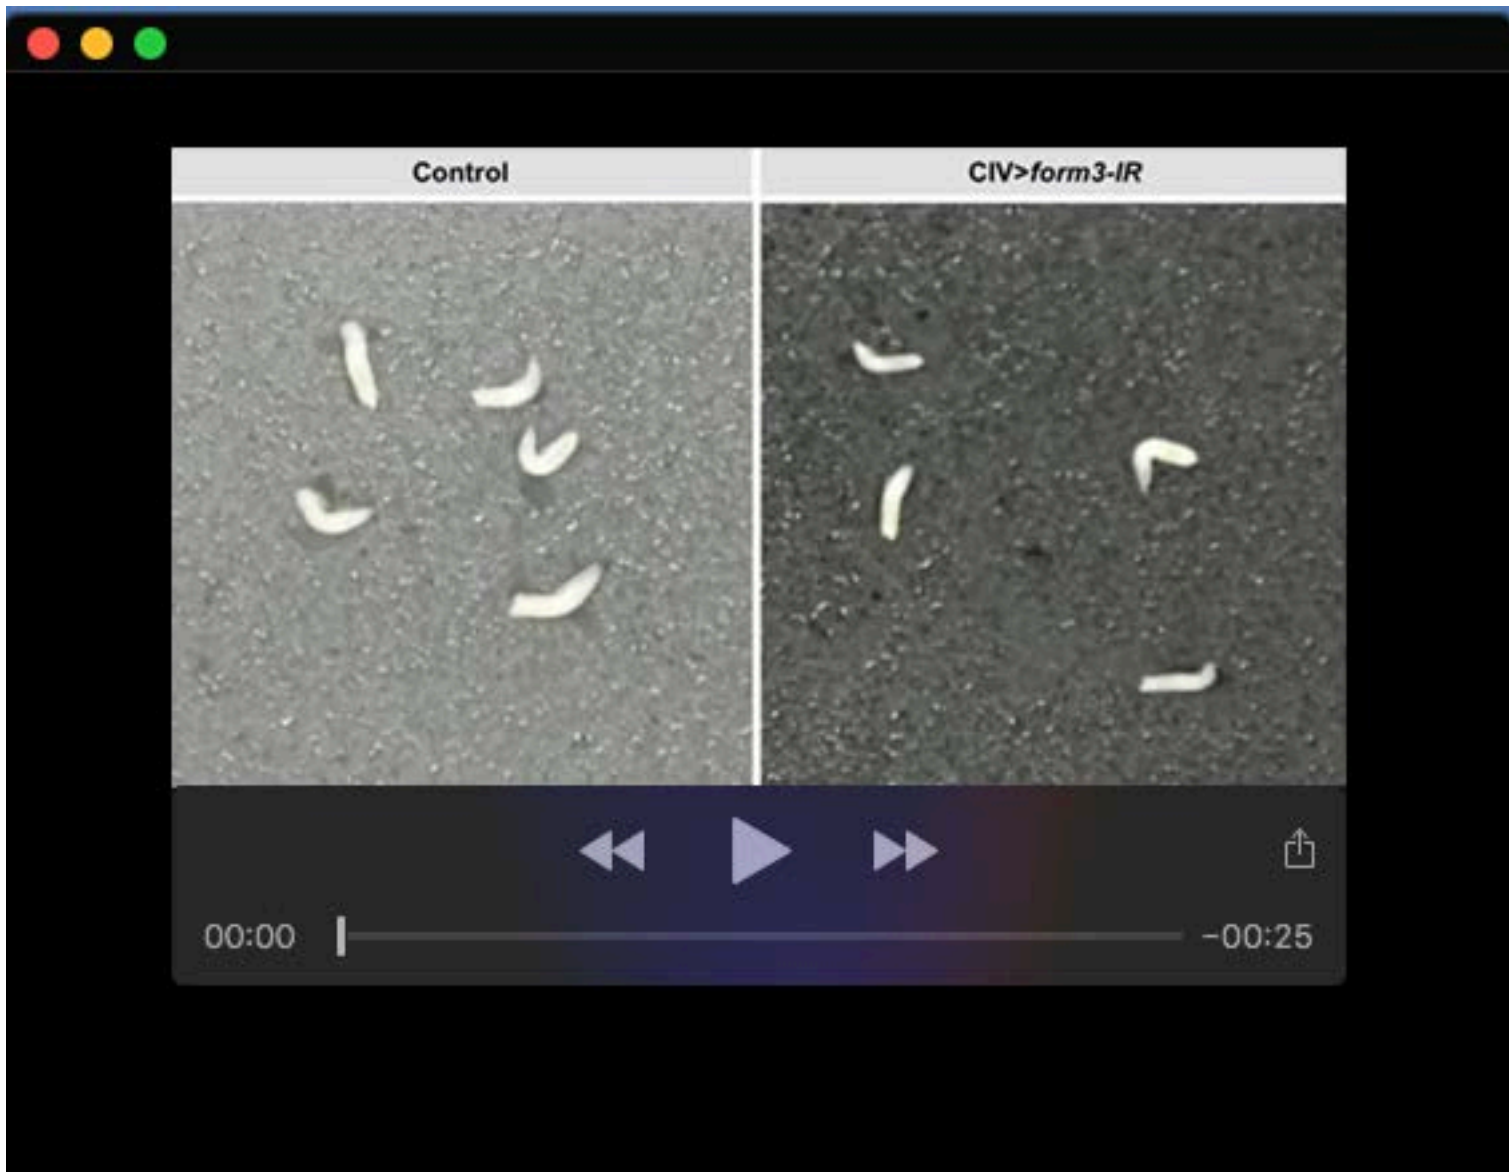

**Movie 1:** form3 disruption in CIV nociceptive neurons severely impairs heat-evoked rolling behavior.



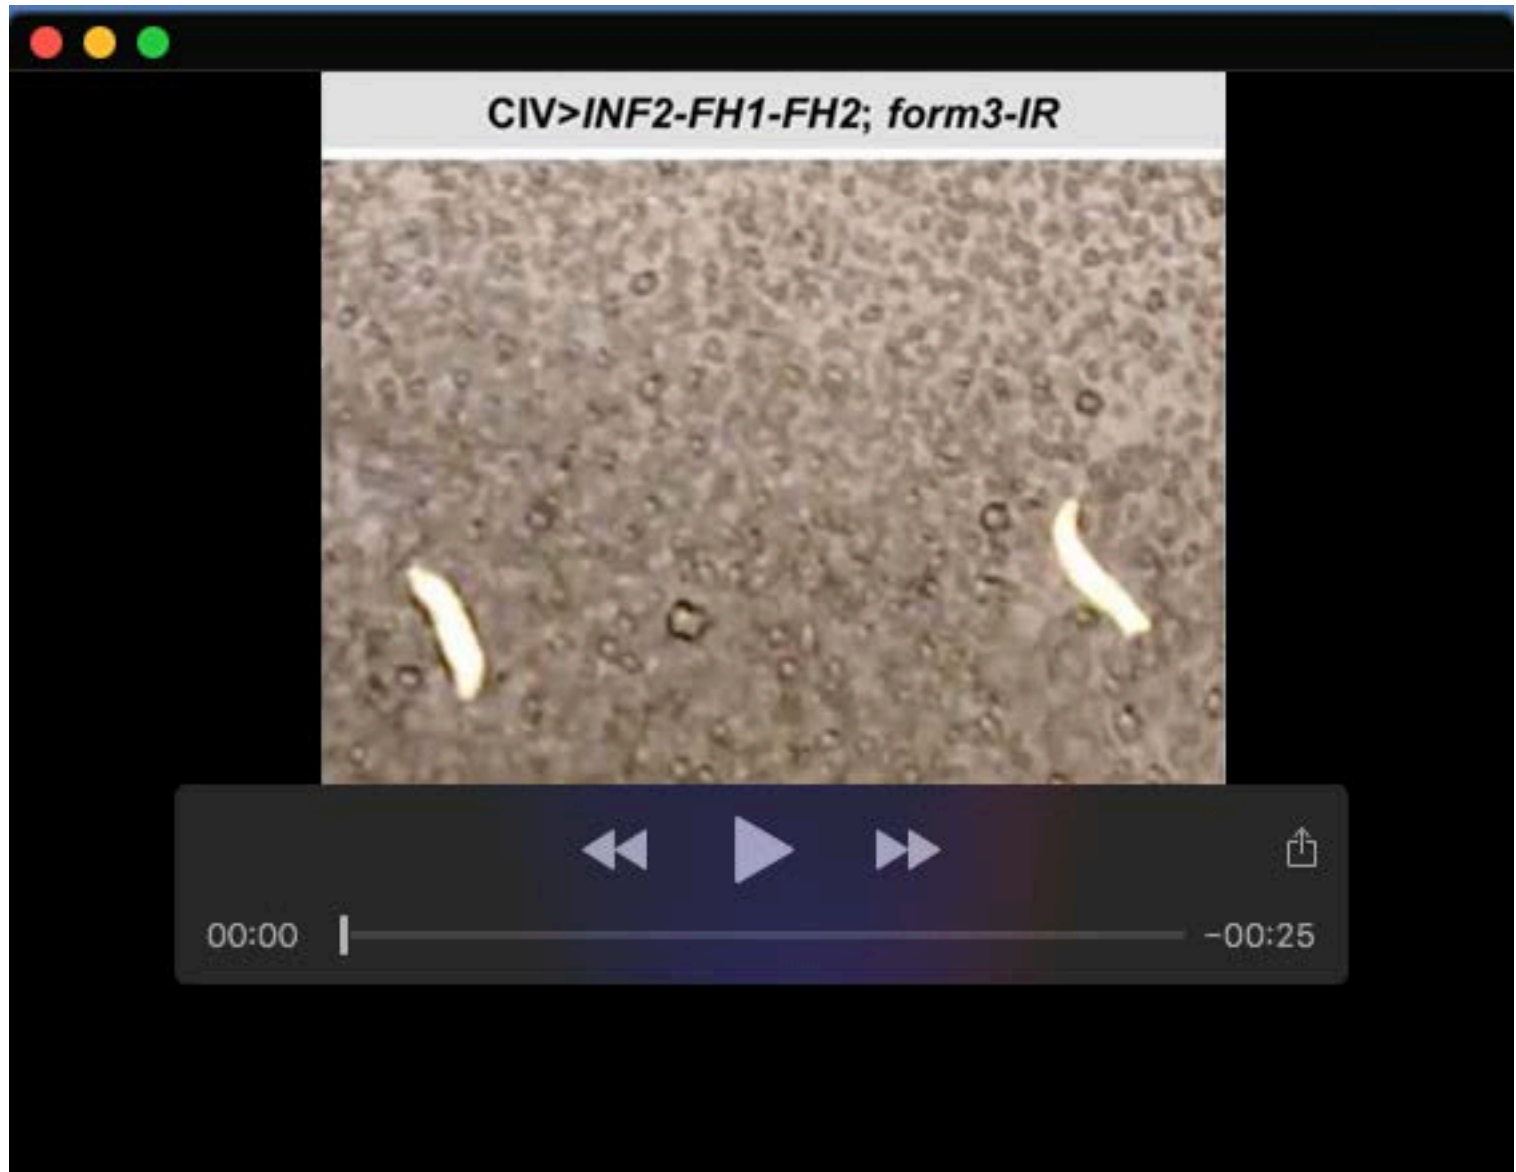

**Movie 2.** INF2-FH1-FH2 rescue of form3 impaired heat-evoked nociceptive rolling behavior.

## Supplemental Materials and Methods

Synthetic Form3-RNAi resistant coding sequence (FLAG tag @C-terminus)- corresponding to Form3-PA isoform

### Start Methionine

Codon modified 54bp sequence highlighted in yellow, with native nucleotides marked in red and silent mutation nucleotides marked in blue

```
atgactcacgcatcggcctggactacattgtcgcgagaatcgtgactacattgctaagctg
M D S R I G L D Y I V E N R D Y I A K L
ggcgctgccctggacaccagaatgccaccgtcaagaagcaggtcttcgagctcctctcc
G A A L D T Q N A T V K K Q V F E L L S
gcgctgtgcgacctacagccccgatggatattgcacgagccatcgaaaccctagaattttac
A L C A Y S P D G Y A R A I E T L E F Y
aagaatctgaaaaacaacgctatcgtttttaaatacgtgattaatgagttggaattgagc
K N L K K Q R Y R F K I V I N E L E L S
agtgccgctgcccatccgcccctggactaccaggccgcccctgctggccttcatcaactgt
S A A A H P P L D Y Q A A L L A F I N C
gtcatcatctcggcggccactctacaggagcggattcgcattcgcacgaatttataggt
V I I S A A T L Q E R I R I R N E F I G
ctcaaagttttgccgctgctcaataacctaaagaaagtcgcacaaagtggtgggcatatc
L K V L P L L N N L R K V A Q S V G D I
attgtacaattggacgtattcgtggagcagcaggaatgacgacgagggccagagccttccag
I V Q L D V F V E Q Q E C D E A Q S L Q
gcgcccgatggcatcaatctcaactcgcattcttgatgtcttctacgccatttttgcgacag
A P D G I N L N S H L D V F Y A I L R Q
gtggctgatacgccacaggaagtgccattcctcaacatactgcagcacctgctgcgcatc
V A D T P Q E V P F L N I L Q H L L R I
gatcccaaggagccgctcagcgacatcatctgggacaccacagagcgtctggtccaccgc
D P K E P L S D I I W D T T E R L V H R
gccacgctcctcgaaagtcacgaggattcagtgcgccctgctgcgacgcccagtagccag
A T L L E S H E D S V R L L R T P S S Q
aagttcgctgccagagttgtcgcggcagcagatgccagcagccccaccgcaagccctct
K F A C Q S C R G S D A S S P T R K P S
cagccggtgggctgtcggccaagacgacgcctccaccaccaccaccaccatggcacc
Q P V G V S A K T T P P P P P P P P M A P
gcagcaccaccgctccgcccaccgcccagataaatggggcagcaccgcccaccaccgcccaccg
A A P P P P P P P I N G A A P P P P P P
ccatgatcaatggtggcgcattgcctccgcccaccaccgcccctctatgcaaatggcc
P M I N G G A L P P P P P P P S M Q M A
tcacggcccaggacaccagatcccttggcagcggaggcgggtggccactgccatactgctg
S R P R T P D P L A A E A V A T A I L L
ccgcaacaggacacaccgctcccaaggccaagatgaagaccattaactggggcaagata
P Q Q D T P A P K A K M K T I N W G K I
ccgcacaacaaggtcctgggcaagcagaacatctggagattgtggccagcaatcaccag
```

P H N K V L G K Q N I W S I V A S N H Q  
gacagcccgatgcaggacatcgactggaacgagatggagggactcttctgcctgcaaaca  
D S P M Q D I D W N E M E G L F C L Q T  
gccagtgcgcagggatcaccaagttgggacgggatggcagtcaggccgcccggatcc  
A S A Q G S P K L G R D G S Q A A A G S  
aatggctgcgataccctggaccgaaagtccaaaaaggagagcacagagatcacctgctt  
N G C D T L D R K S K K E S T E I T L L  
gacggcaagcgaagtctgaatgtgaatatcttcctgaagcaattccgcaccagcaacgac  
D G K R S L N V N I F L K Q F R T S N D  
gacatcatccagttgatccggcagggagcccacgaggagatcggagcggagagattgagg  
D I I Q L I R Q G A H E E I G A E R L R  
ggtttgctgaagataatgcccgaggtggatgagctggacatgctgaaggattcaacggg  
G L L K I M P E V D E L D M L K G F N G  
gataaggcacgactgggcaatgccgagaagttcctgctgcagctgctcgaggtgcccaat  
D K A R L G N A E K F L L Q L L E V P N  
tacaattgcggatcgagagcatggtgctcaaggaggagtttgccggaatgtggcctat  
Y K L R I E S M L L K E E F A A N V A Y  
ctggagccctgtatcaattctatgctctatgctggcgacgatctactgaataataagact  
L E P C I N S M L Y A G D D L L N N K T  
cttcaggaggtcctttacatggctggttgctggaaatttccttaactccggcggctat  
L Q E V L Y M V V V A G N F L N S G G Y  
gcaggaaatgcggcggcgctgaagctatcatcgctgcaaaagctaactgatatccgggcg  
A G N A A G V K L S S L Q K L T D I R A  
aataagccgggcatgaacctcattcacttcgtggctcttcaggcggagaaacgcaatccc  
N K P G M N L I H F V A L Q A E K R N P  
gaactgcttcaattcacaggacaactgagcaacctcgaaagtgccagcaaaacaacatca  
E L L Q F T G Q L S N L E S A S K T T S  
gagcagatcaacaatgaaatcaacacactggacggcaggatcagaagaatagccagacag  
E Q I N N E I N T L D G R I R R I A R Q  
atcgaacaacctgccacggatgtggacatcaaggagcaaatggccgactttttgcaggcc  
I E Q P A T D V D I K E Q M A D F L Q A  
gccgaatccgagctatccgtcctccaagctggcatgaaacaagtggagtcaatgcggctc  
A E S E L S V L Q A G M K Q V E S M R L  
aaaatgtccgagttcttctgcgacgatgcggccaccttcgggctggaggagtgcttcaag  
K M S E F F C D D A A T F R L E E C F K  
atcttcacaatttctgtgataaattcaagcaggcgggtcaaggagaacgagcgcgccag  
I F H N F C D K F K Q A V K E N E R R Q  
cagcaggagcaacaggccacgcttaggaggaagcagcgcgaggagcagctggcccgcaga  
Q Q E Q Q A T L R R K Q R E E Q L A R R  
gccagacagattggcaggtggaacgccagtttcggactcggagcattccttcttgggc  
A R Q I G Q A G T P V S D S E H S F L G  
gatgctatcttcgatcctagggttagtccggcgtgagtcgccgccacctgggatccgga  
D A I F D P R A S P A L S R R H L G S G  
gagatcagcaatggtttcatccgcctggaacaagacggagccttccggacatcacacc  
E I S N G F I R L E Q D G A S P D I T P  
aacggaagtctgaggcgtcggcgtagtcgagttcttgccgaggaggatgacctgatggag  
N G S L R R R R S R V L A E E D D L M E  
ttccttcggagttcgacgggtcctcaccacgatggacacaatagcagggagcgggaaggcg

F L R S S T G P H H D G H N S R E R K A  
gcctacggcagcttggatcgctcgtgggctcgtcgtgcccgctccggaagttccagtcgc  
A Y G S L D R S W A R R A R S G S S S R  
aaacgacccgatttgcacattgactttggcatggatcgtgaacgggcccagctccccg  
K R P D L L N I D F G M D R E R A S S P  
gctcctcttcttcagcagcagcagcaaaatgtccaggagcagactgcaatctccattggcc  
A P L L Q Q Q Q Q N V Q E R L Q S P L A  
agtacagctggaacgccacaacggcagcgaatacgcccacgggagtgatcgggcatt  
S T A G T P T T A A N T P T G S G S A I  
gctcagacgccatctaataacgaggatgcaaaccaagaatatcccgtgagtgccgag  
A Q T P S N N E D A K P R I S R E W R Q  
aagatcgagacgtggcttcaatccaacgagagcgatgagaagcaaacgaggagtacagg  
K I E T W L Q S N E S D E K Q N E E Y R  
cggaagcgtcgtcgttcaacgccaataggcagcgtcgtcgaaaacgaaactgaaaacgaa  
R K R R L V N A N R R S L E N E T E N E  
cgaaaactggacccttgccggaggagaagatcctgccttcgacgacgacagctacgcca  
R K L D P L P E E K I L P S T T T A T P  
acgaatacgctacgaccacgaatcccactaactccactaatagaatggatcaggagtcc  
T N T P T T T N P T N S T N R M D Q E S  
ggcaaatatcagcgcgtctatgccgactggaagccctcgaggacgctggagcagacggac  
G K Y Q R V Y A D W K P S R T L E Q T D  
gtggtggccaatctgcaggccattgccgatgccagccgcacgatgcattgcgtcaacat  
V V A N L Q A I A D A Q P H D A L R Q H  
cgccgacagcagatcgcaggaacagccgagtcctcatagcacttcaatcgatagccgaggag  
R R Q R S Q E Q P S P I A L Q S I A E E  
gatcgtcgaaagtcccttattcagaaacaggggtgaaagggacaagagcaacgagcggttg  
D R R K S L I Q K Q G E R D K S N E R L  
caaatctatatcaggcagatcctccagccgggaactgcagcctgcgaaaacggaggagcat  
Q I Y I R R S S S R E L Q P A K T E E H  
ccactgccaccaagtcaccaagccacaagtgccgacgacacctttgccagcctgctc  
P L P P K S P K P Q V S D D T F A S L L  
agtcaccacaagacccaaaacgagatgcagggtcctccaaggacgtggatgcggataat  
S H H K T Q N E M Q G S S K D V D A D N  
atagagacgccaccagtgagccgacgggtcatagccacgcccaccaccacagtggtcacg  
I E T P P V S R R V I A T P T T T V V T  
gtgagcatgacggataaaccaaggctgcgacggaggagaagatcaaccagcggaaacag  
V S M T D K P K A A T E E K I N P A E Q  
gatgcgcccgggtcacttcgatcgccatgccctggctcgccgcacacgacgctacaaaaga  
D A P G H F D R H A L A R R T R R Y K R  
cccacggactacagcagtggaatgaggaggcgtgaccaccagcacagcagaggcaaag  
P T D Y S S G N E E A L T T S T A E A K  
acttctccatcgaagccagagccacccgcacccgagaagtccaagcagaaggagcgcag  
T S P S K P E P P A P E K S K Q K E R T  
atcaacaagctggagaaggtgggtcgccacataagctccatcaatcaggaggatgtaagg  
I N K L E K V G R H I S S I N Q E D V R  
gaggccattcggaatcttaaatcaccacgggaactccagaacgaccttggagtcgcca  
E A I R N L K S P T G T P E R P W S P P  
cgggatatcacaccctccaagctaaaactgtccgcccagtggtcaccacgaactgaatgac

R D I T P S K L K L S A S G H H E L N D  
gaaggcttcgaggagactcagagtcttgtgtcggacactccgtctcacgaaagggcgag  
E G F E E T Q S L V S D T P S H G K G E  
agcacaactcctcctgcaacgaggggtgtaaacgagactcctgcccggcagcggccgatg  
S T N S S C N E G V N E T P A R Q R P M  
cagaagcaaaagcccacaaccaccagcatcagccagatgggcagtcgggtggccgatcgc  
Q K Q K P T T T S I S Q M G S R L A D R  
ctgcagcaggccaggatgaagagttccggatcctcaggatcggcagccagcaagtcacaa  
L Q Q A R M K S S G S S G S A A S K S Q  
aaccaaatccctgccacccaaactgcaacggtcaagaggagcctctccgccagcagaccg  
N Q I P A T Q T A T V K R S L S A S R P  
ctgcgcatgcccaacggtcagccggtggccagtgagctccgctgagatccgcatccact  
L R M P N G Q P L A S A A P L R S A S T  
gtgagacgctcggcagcagcaacaggttctagccggcgtggagcggagcagttcgaga  
V R R S P Q E Q Q V L A G V E R S S S R  
aacagtctgcgctcctcgcgatcgtccatcaacagtgaggcctccactcaaactgtagt  
N S L R S S R S S I N S G A S T Q T V V  
agacgactgcccgcttcagcagcgggagccactgtgtccggtgactcctcgcccagc  
R R L P A V Q R A G A T V S V D S S P S  
aaaagaccactggccgcccagaatctgcgacctaccagggacgtggagtccccgccagc  
K R P L A A Q N L R P T Q G R G V P A S  
aggagcagcagtagcgggtcgagtgtgggacccagtgatccttggtgagcagcaagatg  
R S S S S G S S V G P S V I L V R S K M  
tccaacacggctccgaaatcgagtatccatggttagcaccagttttaaggaaaaccagtcc  
S N T A P K S S I H G S T S F K E N Q S  
cagtcccaaccccagtcacagtcaccgaatgagcgcgctcgcagcgtggtgctggtgaaa  
Q S Q P Q S Q S R M S A A R S V V L V K  
aatgccctgaaccagcagcagcaggccaggatgagtgcaaccccagtcgcgagcagagg  
N A L N Q Q Q Q A R M S A N P S P Q Q R  
agcactagcagcagtcgatccgtgagcagcttcatgagcaccacggccagcagtgccacc  
S T S S S R S V S S F M R P T A S S A T  
aagcgacagaaggactacaagacgatgacgacaagtga  
K R Q K D Y K D D D D K -
